# Supplementary material for: Dynamics of Snow and Glacier Cover in the Upper Karnali Basin, Nepal: An Analysis of Its Relationship with Climatic and Topographic Parameters
Source: Copernicus journal article supplement (doi:10.5194/egusphere-2025-1303), 2025-05-08
Supplement: Supplementary file 1 [file egusphere-2025-1303-supplement.pdf]

Supplement

Snow cover data derived from Landsat 7 and 8 for different periods. The data shows the limitations and scope of Landsat-7 and 8 data.

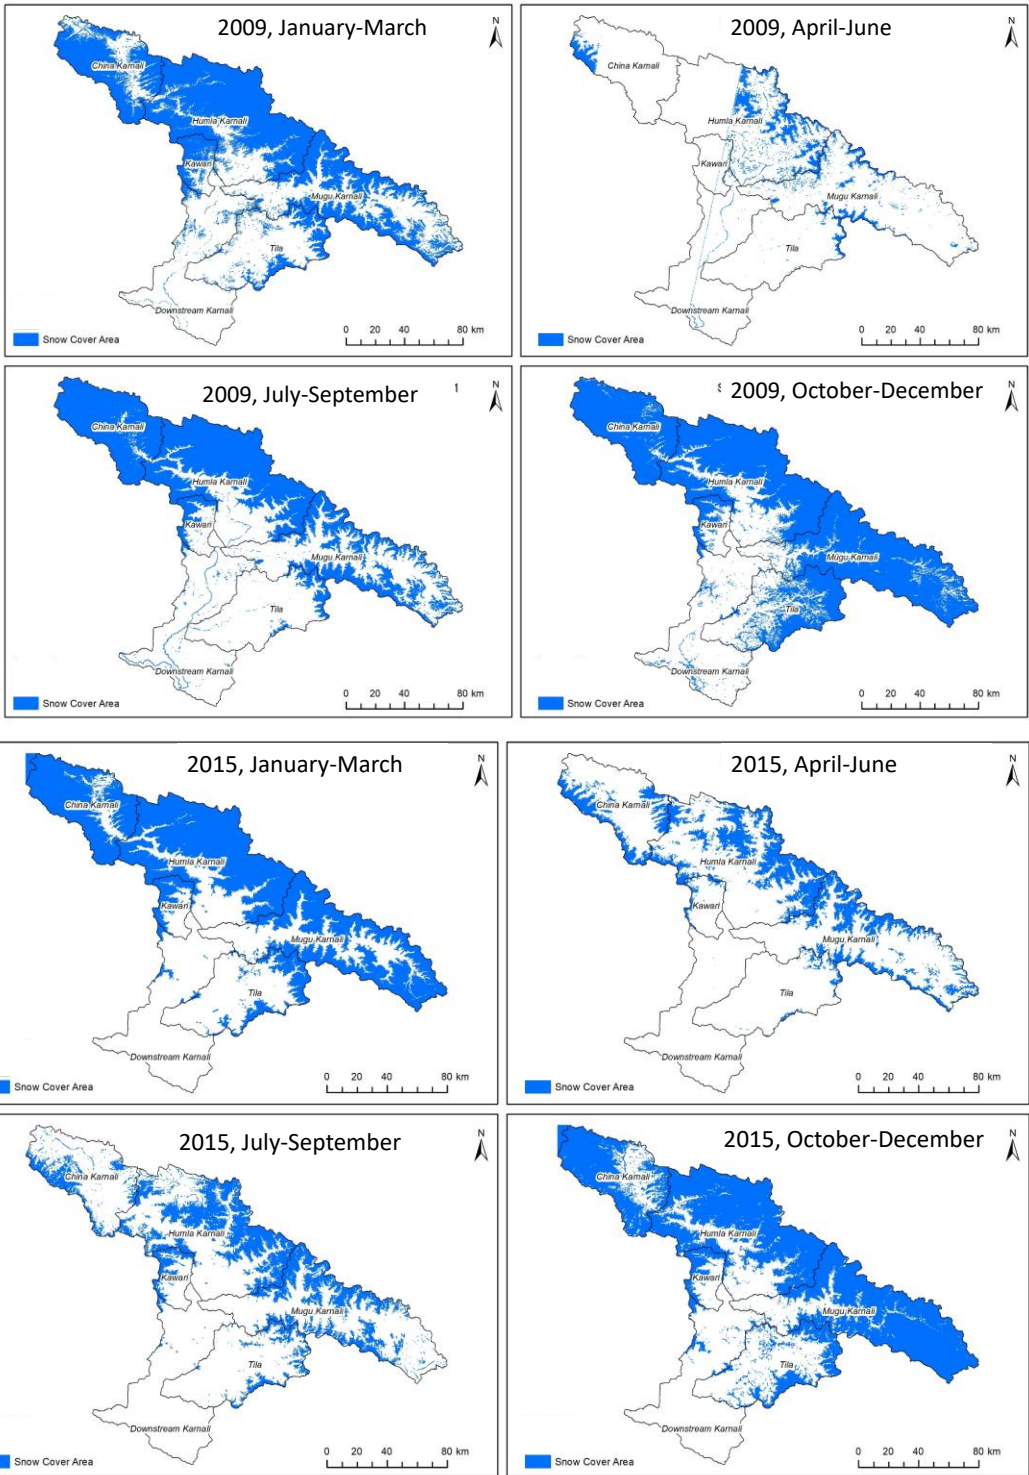

7

8 (contd.)

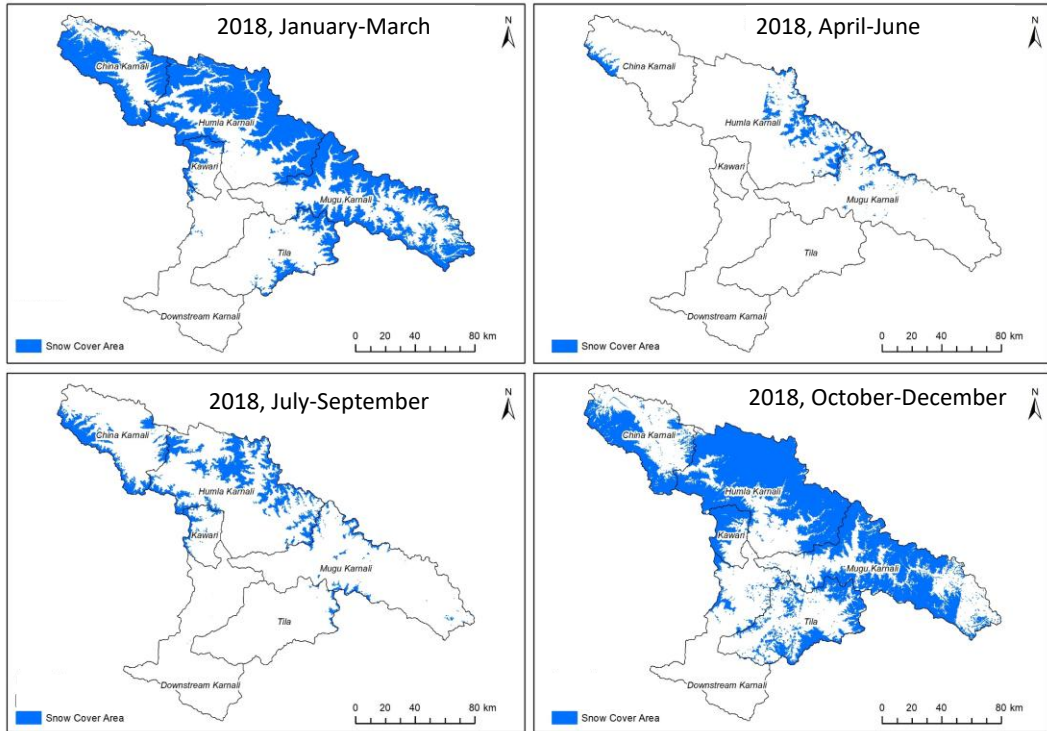

9

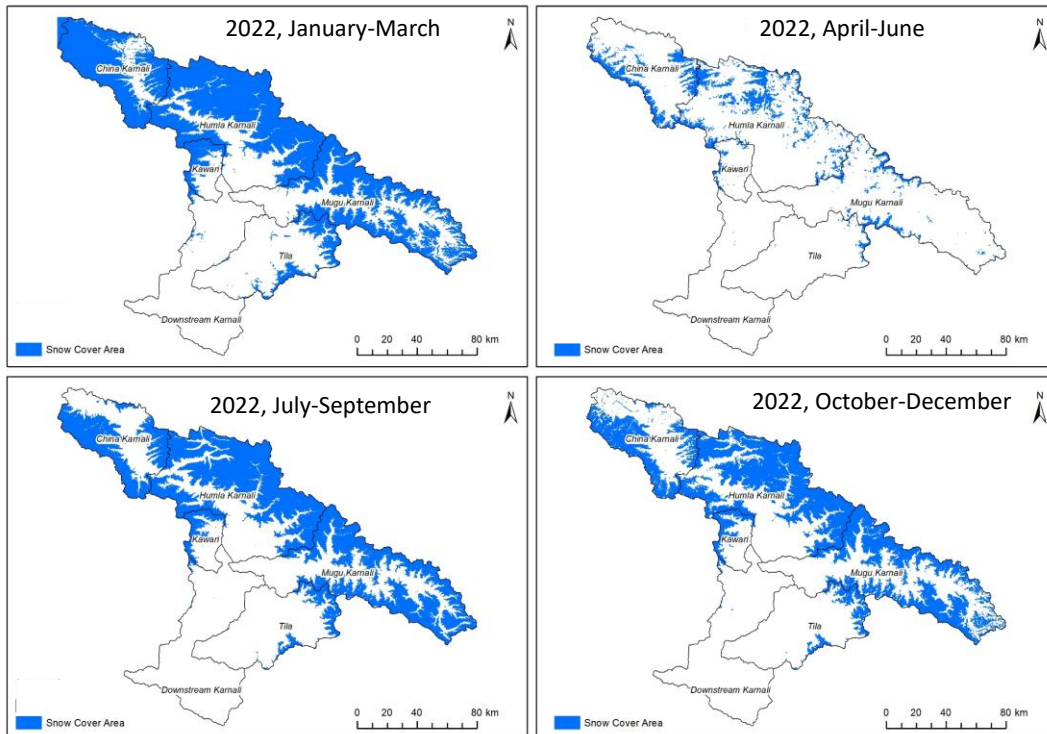

10

11
